# Supplementary material for: Structural arrangement of two DNA double helices using cross-linked oligonucleotide connectorsElectronic supplementary information (ESI) available: HPLC profiles and MALDI-TOF-MS of the cross-linked oligonucleotides. See http://www.rsc.org/suppdata/cc/b4/b402783c/
Source: Royal Society of Chemistry journal article supplement (doi:10.1039/b402783c), 2004-01-01
Supplement: b402783c.pdf [file b402783c.pdf]

## Structural Arrangement of Two DNA Double Helices Using Cross-Linked Oligonucleotide Connectors

Masayuki Endo\* and Tetsuro Majima\*

*Institute of Scientific and Industrial Research, Osaka University*

*8-1 Mihogaoka, Ibaraki, Osaka 567-0047, Japan.*

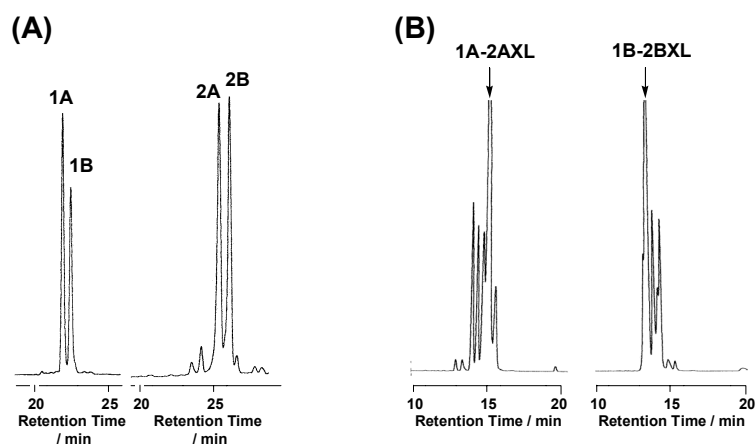

**Fig. S1** HPLC profiles for the diastereomers mixtures of **1** and **2** (A), and the reaction mixtures of the cross-linked oligonucleotides with diastereochemically pure oligonucleotides (B). HPLC conditions, (A) linear gradient with 2-12 % acetonitrile/water (30 min) containing 50 mM ammonium formate, Nacalai Cosmosil C18 reversed-phase column (7.5 x 150 mm), 2.0 mL/min, 260 nm; (B) 2-15 % acetonitrile/water (20 min) and the same conditions as in (A).

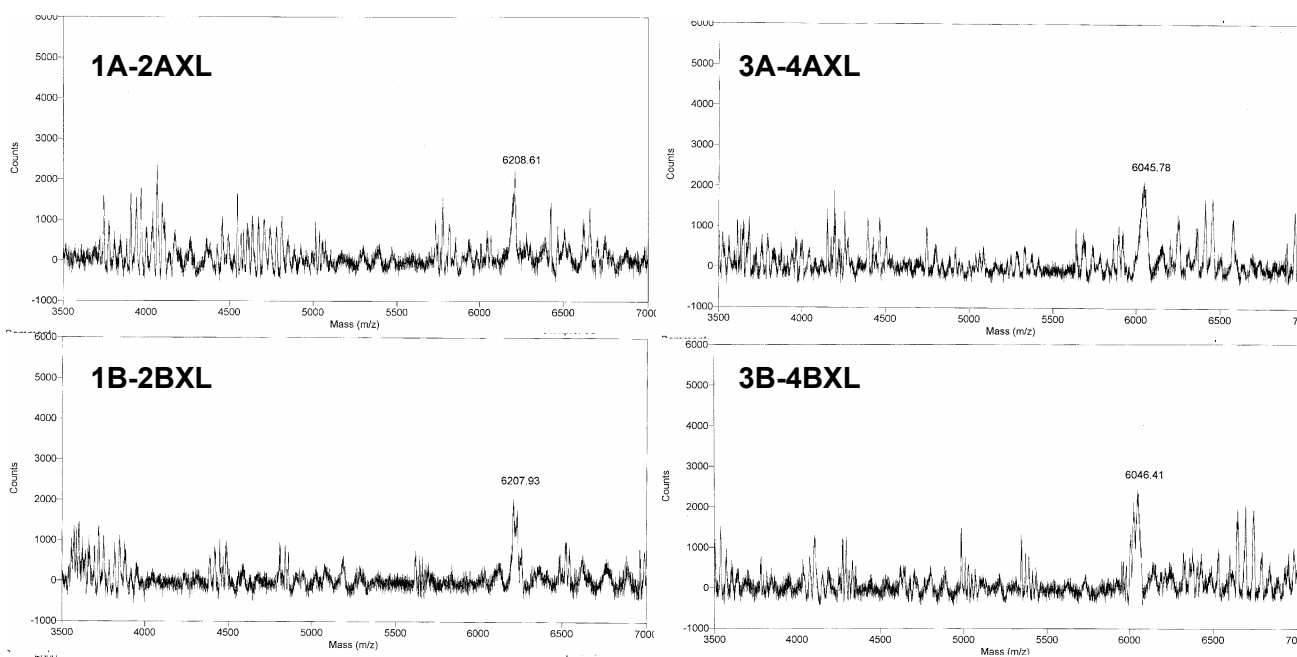

**Fig. S2** MALDI-TOF-MS of the cross-linked oligonucleotides.
